# Supplementary material
Source: MDPI journal article supplement (https://www.mdpi.com/2379-139X/9/1/30)
Supplement: s1 [file s1]

## Supplemental Figures for Tomography Special Issue on “Co-Clinical Trials”

**Manuscript Title:** Evaluation of ADC Repeatability and Reproducibility of Pre-Clinical MRIs Using Standardized Procedures and DWI Phantom

**First Author:** Dariya Malyarenko

**Communicating Author:** Thomas L. Chenevert

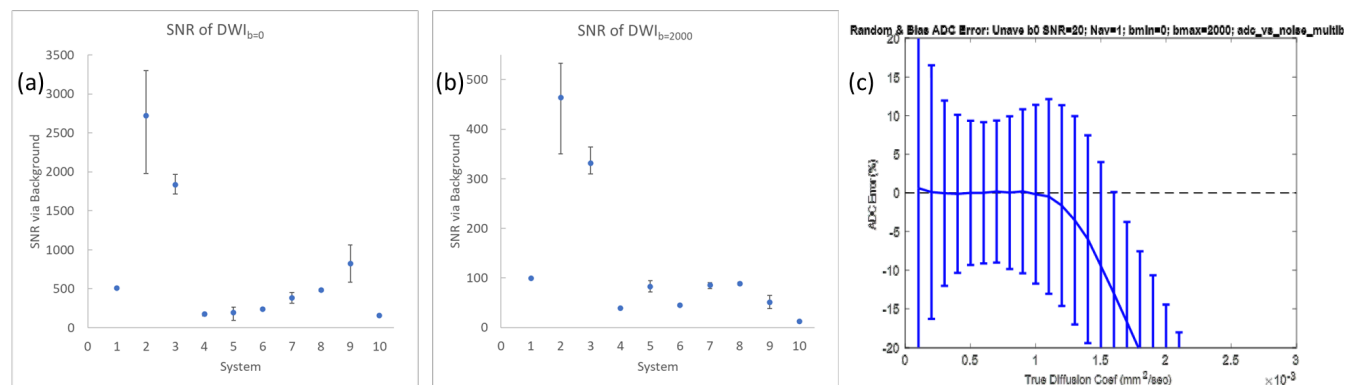

**Supplemental Figure S1.** Measured SNR at isocenter on ten CIRC MRI systems using (a) low  $b$ -value = 0 DWI and (b) high  $b$ -value = 2000sec/mm<sup>2</sup>. (c) Simulation of random error and bias for the standardized DWI protocol for SNR = 20 (at  $b=0$ ) corresponding to onset of negative bias for  $D_{true} = 1.1\mu\text{m}^2/\text{ms}$ . Measured SNR at isocenter exceeded 150 on all CIRC systems, therefore measurements of ADC bias were not significantly affected by low SNR.

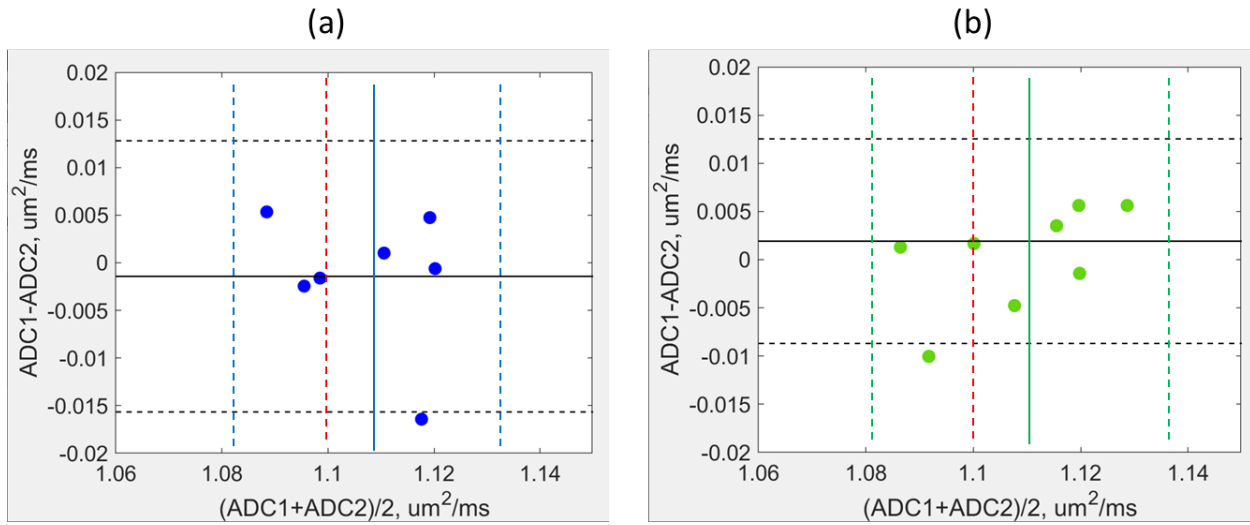

**Supplemental Figure S2.** Bland-Altman analysis of intra-scan (a) and day-to-day (b) repeatability is shown for isocenter ADC (single slice ROI) of the pre-clinical MRI scanners (excluding outlier systems Sys 9 and Sys 10). For intra-scan repeatability, only the first scan day was used. For inter-scan repeatability, only the first scan of both days was used. Solid horizontal line marks the bias, and dashed lines correspond to 95% limits of agreement ( $\text{LOA} = \text{bias} \pm 1.96 \cdot \text{SD}(\text{ADC1}-\text{ADC2})$ ). The averaged observed repeatability was within  $0.015 \mu\text{m}^2/\text{ms}$ . With respect to  $D_{\text{true}} = 1.1 \mu\text{m}^2/\text{ms}$  (red vertical dashes), mean across systems ADC (solid vertical lines) exhibits apparent positive bias of  $0.007 \mu\text{m}^2/\text{ms}$  in (a) and  $0.009 \mu\text{m}^2/\text{ms}$  in (b), and  $\text{LOA} = \text{bias} \pm (0.025, 0.029) \mu\text{m}^2/\text{ms}$  (dashed vertical lines). The average multi-scanner reproducibility for (a) and (b) is within  $0.03 \mu\text{m}^2/\text{ms}$  (3%) with 1% positive bias.
